# Supplementary material
Source: PubMed Central journal article supplement (PMC10620674)
Supplement: jamadermatol-e234090-s001.pdf [file jamadermatol-e234090-s001.pdf]

## Supplemental Online Content

Ingrassia JP, Maqsood MH, Gelfand JM, et al. Cardiovascular and venous thromboembolic risk with JAK inhibitors in immune-mediated inflammatory skin diseases: a systematic review and meta-analysis. *JAMA Dermatol*. Published online November 1, 2023. doi:10.1001/jamadermatol.2023.4090

**eTable.** Cochrane risk of assessment bias

**eFigure 1.** PRISMA flow

**eFigure 2.** Effect of JAK inhibitors on composite of MACE and all-cause mortality (primary analysis)

**eFigure 3.** Effect of JAK inhibitors on VTE (primary analysis)

**eFigure 4.** Funnel plot: effect of JAK inhibitors on composite of MACE and all-cause mortality (secondary analysis)

**eFigure 5.** Funnel plot: effect of JAK inhibitors on VTE (secondary analysis)

**eFigure 6.** Secondary analysis

**eAppendix.** PRISMA checklist

This supplemental material has been provided by the authors to give readers additional information about their work.

**eTable.** Cochrane risk of assessment bias

| Trial        | Author (year)               | Selection Bias             |                        | Performance Bias      | Detection Bias                 | Attrition Bias            | Reporting Bias      |
|--------------|-----------------------------|----------------------------|------------------------|-----------------------|--------------------------------|---------------------------|---------------------|
|              |                             | Random Sequence Generation | Allocation concealment | Blinding participants | Blinding of outcome assessment | Unequal loss of follow-up | Selective reporting |
| JADE MONO-1  | Simpson et al (2020)        | ?                          | -                      | -                     | -                              | -                         | -                   |
| JADE-MONO-2  | Silverberg et al (2020)     | ?                          | -                      | -                     | -                              | -                         | -                   |
| JADE Teen    | Eichenfield et al (2021)    | -                          | -                      | -                     | -                              | -                         | -                   |
| JADE DARE    | Riech et al (2022)          | -                          | -                      | -                     | -                              | -                         | -                   |
| JADE REGIMEN | Blauvelt et al (2021)       | ?                          | -                      | -                     | -                              | -                         | -                   |
| JADE Compare | Bieber et al (2021)         | ?                          | -                      | -                     | -                              | -                         | -                   |
| Heads Up     | Blauvelt et al (2021)       | ?                          | -                      | -                     | -                              | -                         | -                   |
| Measure Up 1 | Guttman-Yassky et al (2021) | ?                          | -                      | -                     | -                              | -                         | -                   |
| Measure Up 2 | Guttman-Yassky et al (2021) | ?                          | -                      | -                     | -                              | -                         | -                   |
| AD Up        | Reich et al (2021)          | ?                          | -                      | -                     | -                              | -                         | -                   |
| Rising Up    | Katoh et al (2022)          | ?                          | -                      | -                     | -                              | -                         | -                   |

|                |                       |   |   |   |   |   |   |
|----------------|-----------------------|---|---|---|---|---|---|
| BREEZE-AD1     | Simpson et al (2020)  | ? | - | - | - | - | - |
| BREEZE-AD2     | Simpson et al (2020)  | ? | - | - | - | - | - |
| BREEZE-AD4     | Bieber et al (2022)   | ? | - | - | - | - | - |
| BREEZE-AD5     | Simpson et al (2021)  | ? | - | - | - | - | - |
| BREEZE-AD7     | Reich et al (2020)    | ? | - | - | - | - | - |
| BREEZE-AD-PEDS | Torrelo et al (2023)  | ? | - | - | - | - | - |
| TRuE-AD1       | Papp et al (2021)     | - | - | - | - | - | - |
| TRuE-AD2       | Papp et al (2021)     | - | - | - | - | - | - |
| BRAVE-AA1      | King et al (2022)     | - | - | - | - | - | - |
| BRAVE-AA2      | King et al (2022)     | - | - | - | - | - | - |
|                | Bachelez et al (2015) | - | - | - | - | - | - |
| OPT Pivotal 1  | Papp et al (2015)     | - | - | - | - | - | - |
| OPT Pivotal 2  | Papp et al (2015)     | - | - | - | - | - | - |
|                | Zhang et al (2017)    | ? | - | - | - | - | - |
| SELECT-PSA 1   | McInnes et al (2021)  | ? | - | - | - | - | - |
| SELECT-PSA 2   | Mease et al (2021)    | ? | - | - | - | - | - |
| Opal Broaden   | Mease et al (2017)    | - | - | - | - | - | - |

|                |                          |   |   |   |   |   |   |
|----------------|--------------------------|---|---|---|---|---|---|
| OPAL Beyond    | Gladman et al (2017)     | - | - | - | - | - | - |
|                | Leng et al (2023)        | - | - | - | - | - | - |
| TRuE-V1        | Rosmarin et al (2022)    | - | - | - | - | - | - |
| TRuE-V2        | Rosmarin et al (2022)    | - | - | - | - | - | - |
| ALLEGRO-2b/3   | <i>Not published yet</i> | ? | - | - | - | - | - |
| Peds: Part 1   | Nakagawa et al (2021)    | ? | - | - | - | - | - |
| Adults: QBA4-1 | Nakagawa et al (2020)    | ? | - | - | - | - | - |

Keys: - No risk of bias, + risk of bias, ? unknown risk of bias

eFigure 1. PRISMA flow

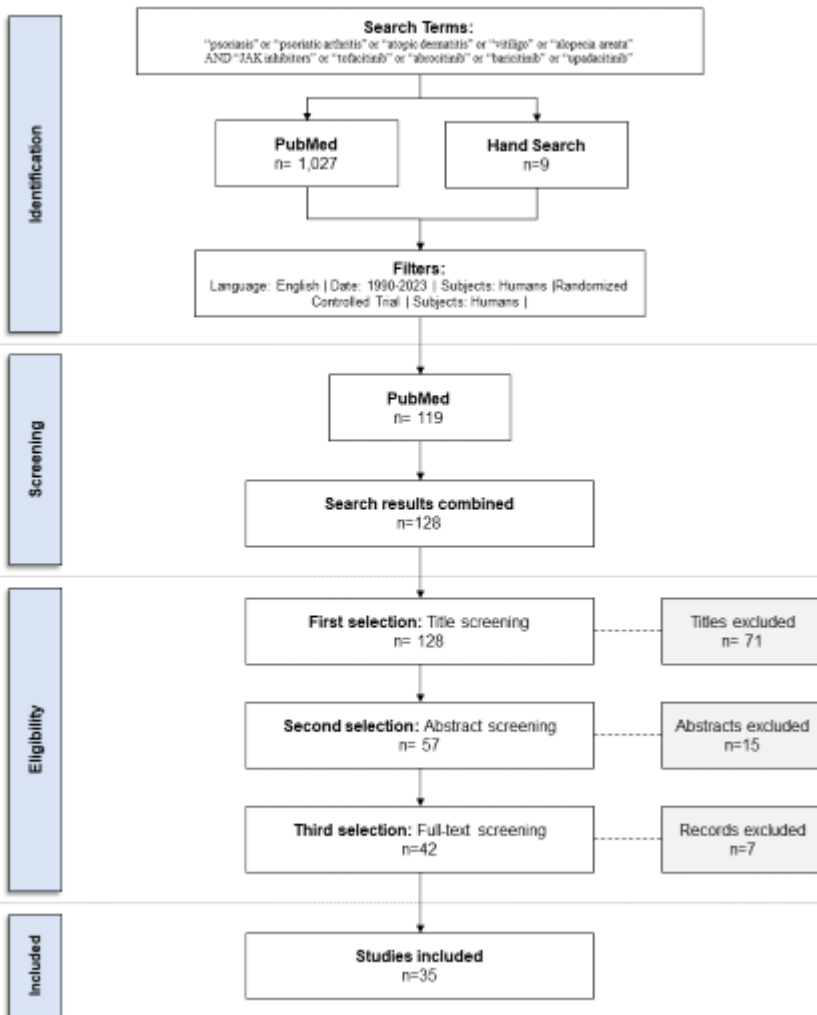

**eFigure 2.** Effect of JAK inhibitors on composite of MACE and all-cause mortality (primary analysis). Panel A: funnel plot; Panel B sensitivity analysis by exclusion of pediatric trials based on oral vs topical JAK inhibitor; Panel C: sensitivity analysis by exclusion of pediatric trials based on type of IMID

Panel A

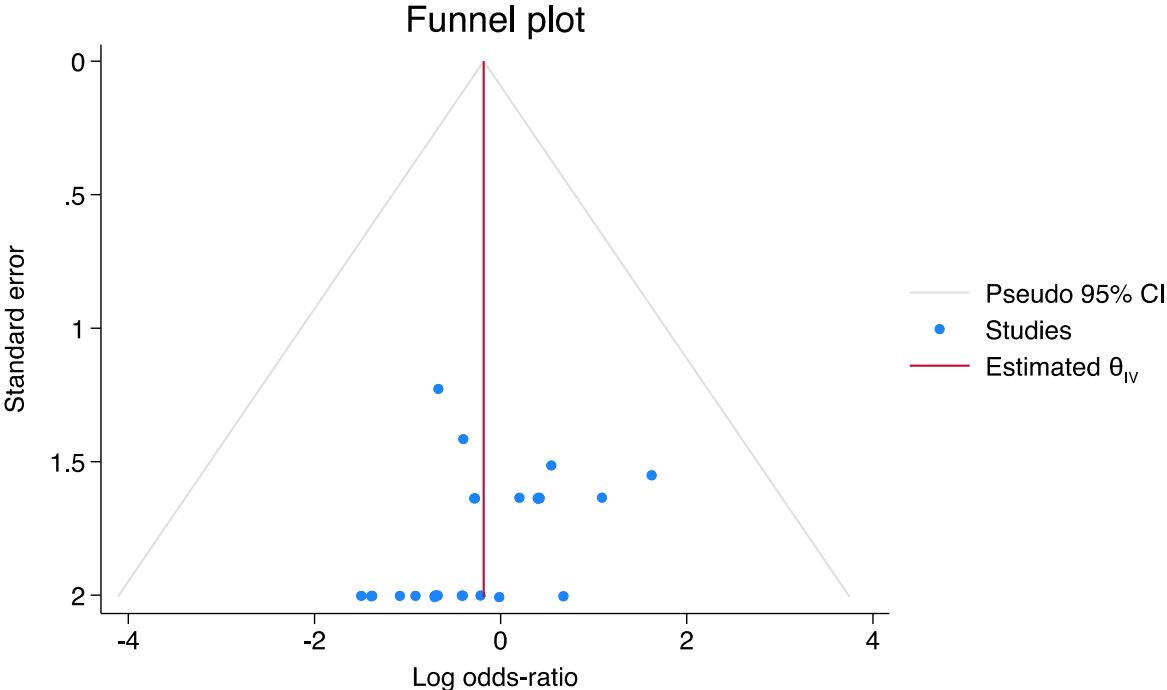

Panel B

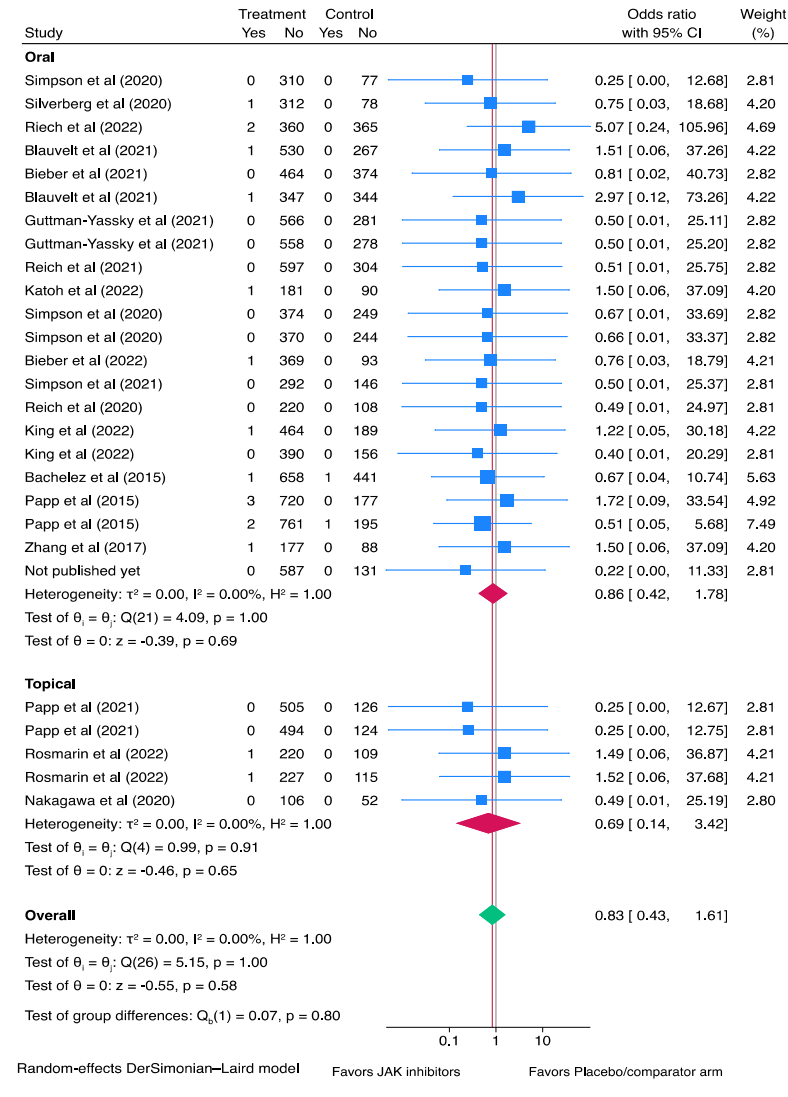

# Panel C

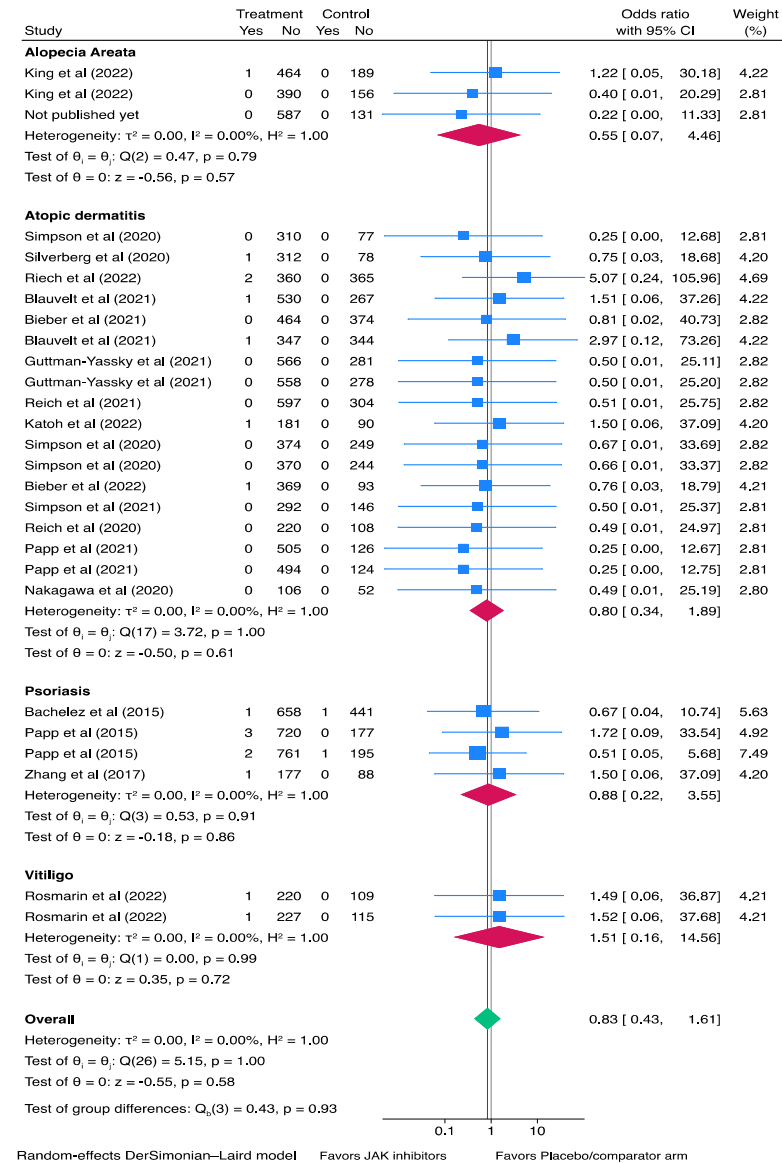

Random-effects DerSimonian-Laird model      Favours JAK inhibitors      Favours Placebo/comparator arm



**eFigure 3.** Effect of JAK inhibitors on VTE (primary analysis).

Panel A: funnel plot; Panel B sensitivity analysis by exclusion of pediatric trials based on oral vs topical JAK inhibitor; panel C: sensitivity analysis by exclusion of pediatric trials based on type of IMiD

Panel A

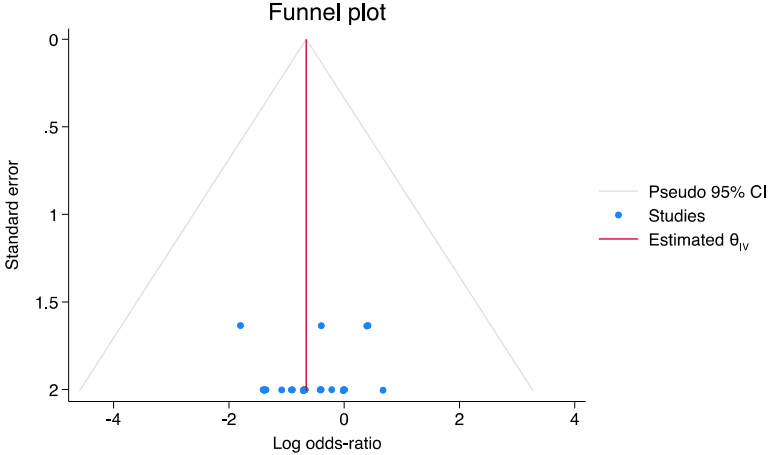

Panel B

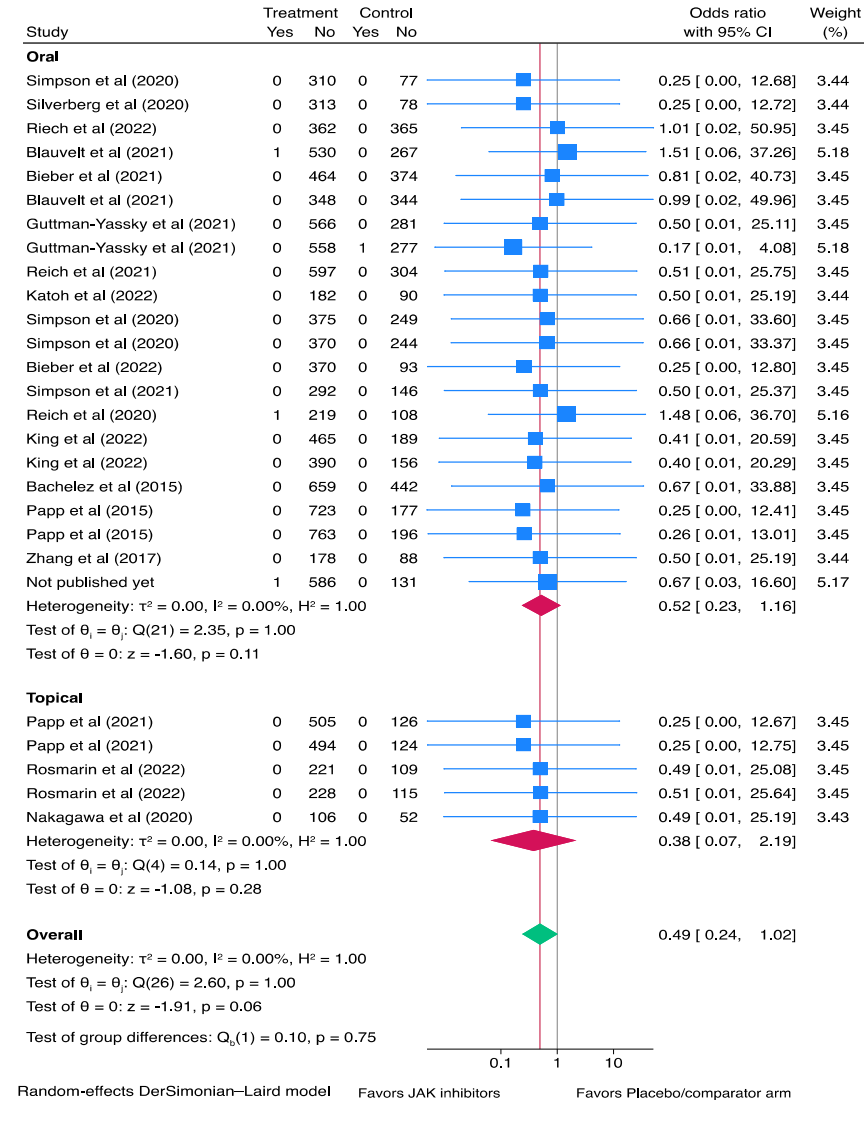

# Panel C

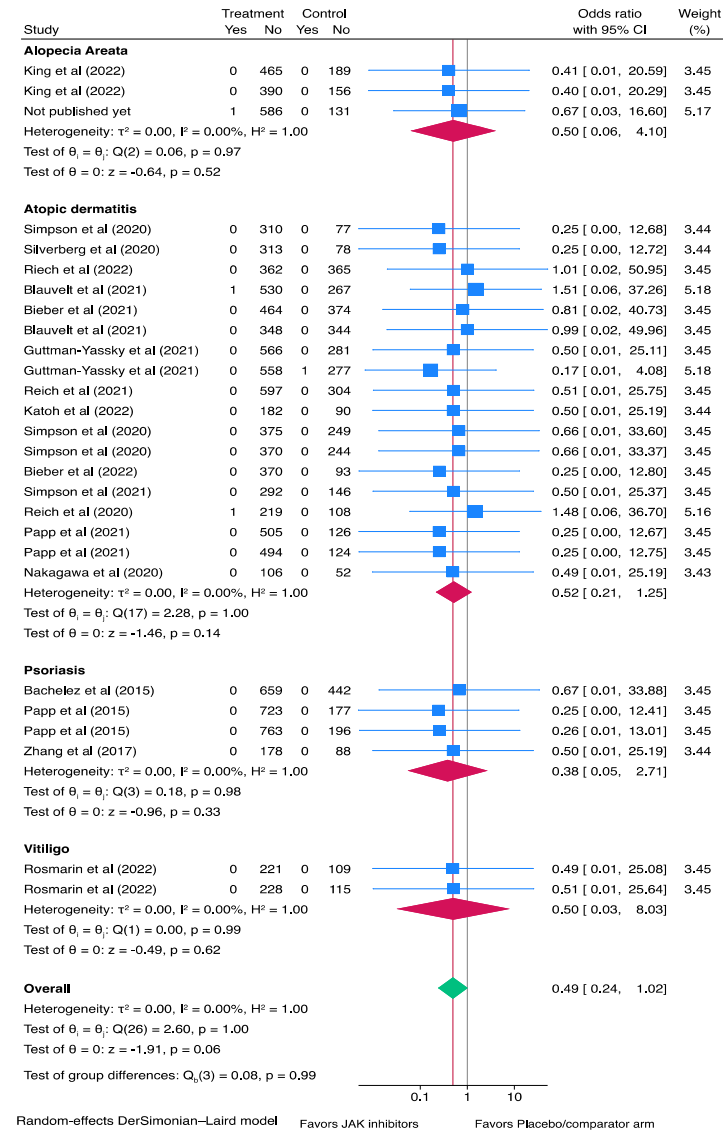

**eFigure 4.** Funnel plot. Effect of JAK inhibitors on composite of MACE and all-cause mortality (secondary analysis).

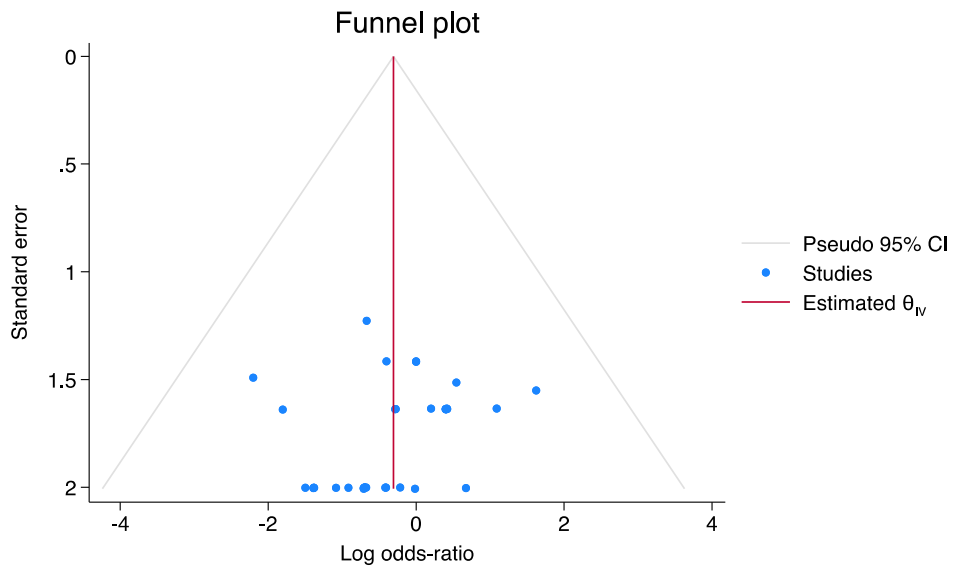

**eFigure 5.** Funnel plot. Effect of JAK inhibitors on VTE (secondary analysis).

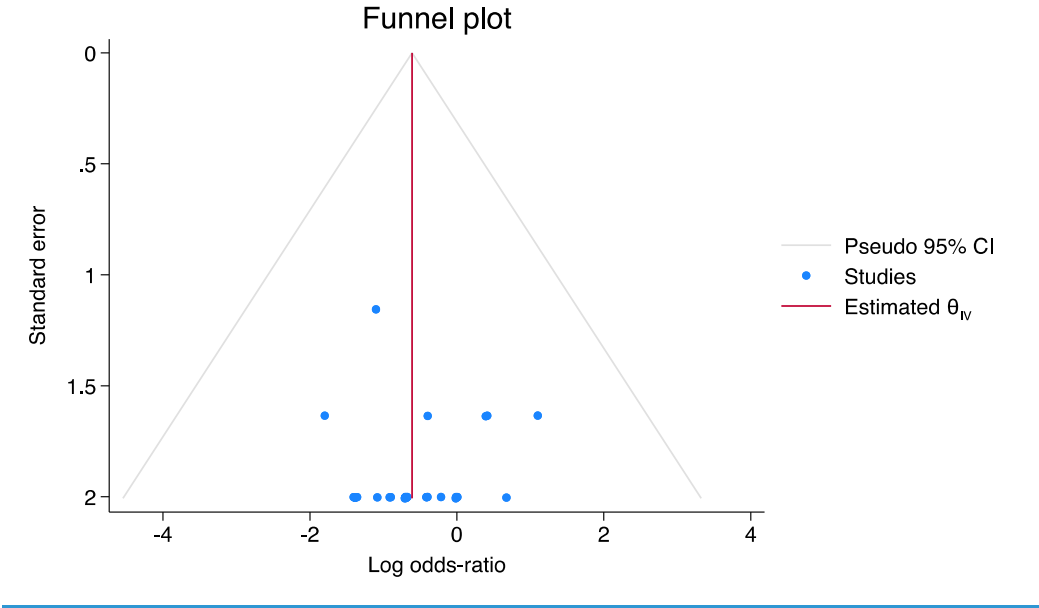

**eFigure 6.** Secondary analysis. Panel A: Composite of MACE and all-cause mortality with JAK inhibitors including psoriatic arthritis trials. Panel B: composite of VTE with JAK inhibitors including psoriatic arthritis trials.

Abbreviations: MACE: major adverse cardiac events; VTE: venous thromboembolism.

# Panel A

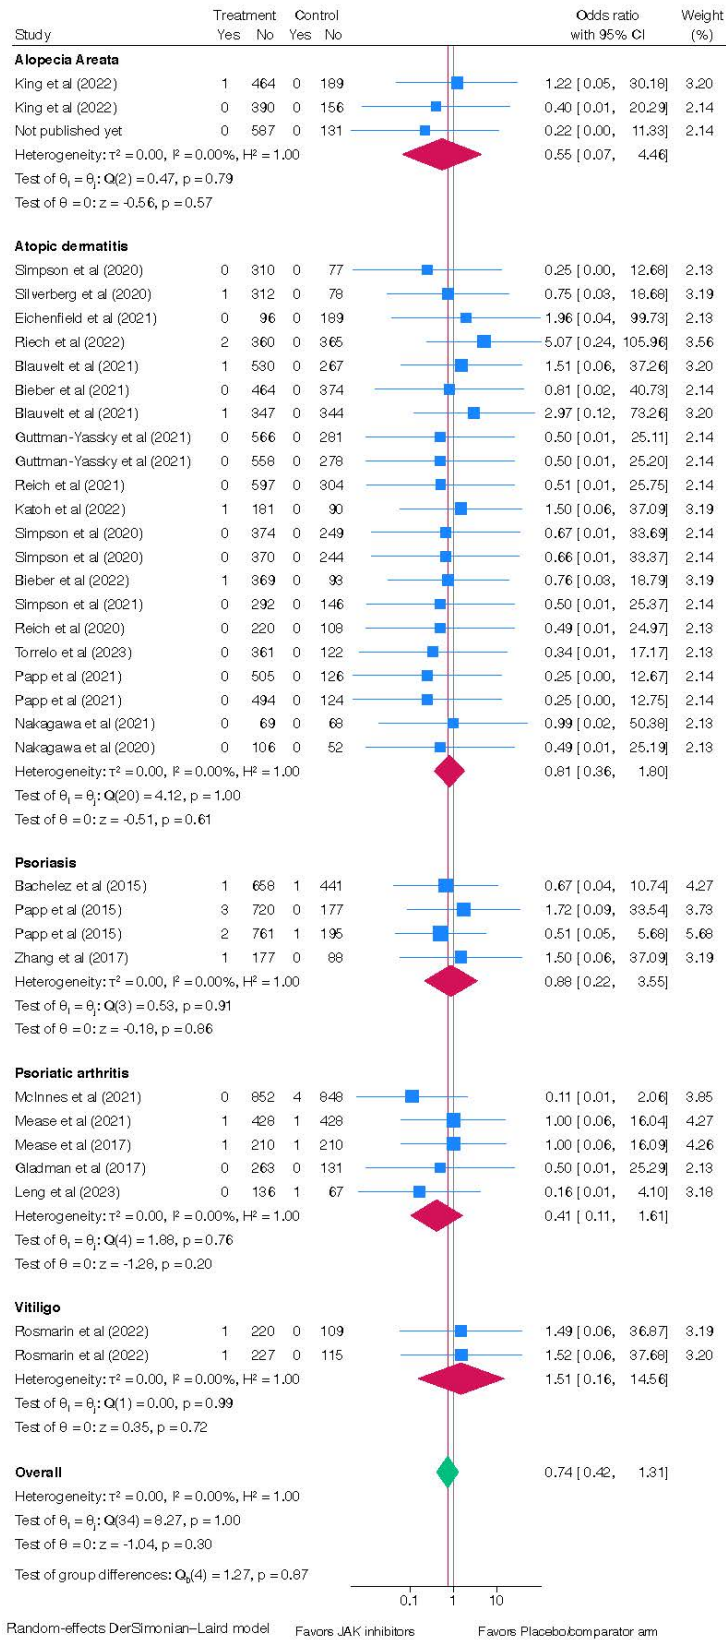

## Panel B

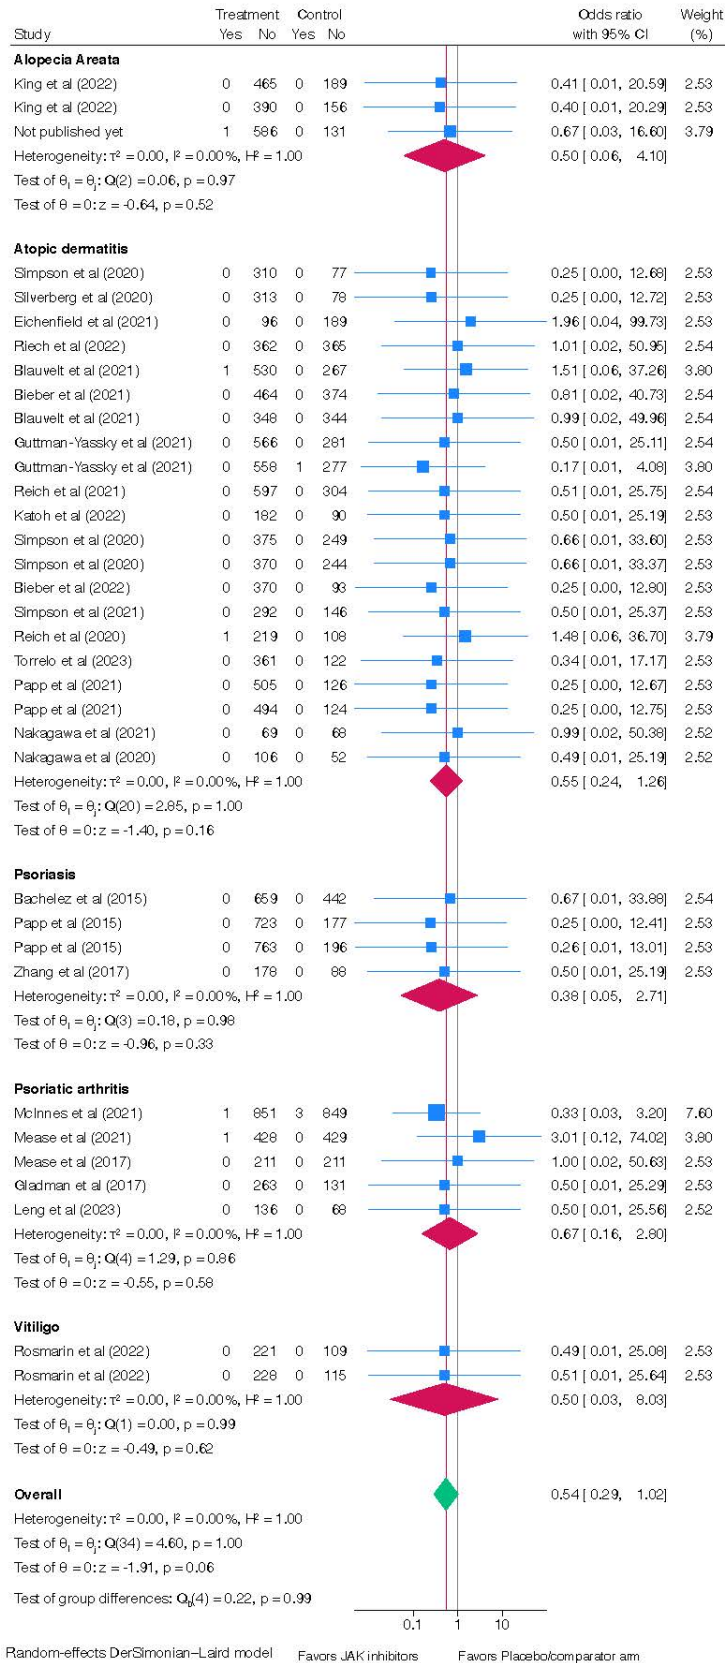



## eAppendix. PRISMA checklist

### 3.1 PRISMA Checklist

| Section/topic             | #  | Checklist item                                                                                                                                                                                                                                                                                              | Reported on page # |
|---------------------------|----|-------------------------------------------------------------------------------------------------------------------------------------------------------------------------------------------------------------------------------------------------------------------------------------------------------------|--------------------|
| <b>TITLE</b>              |    |                                                                                                                                                                                                                                                                                                             |                    |
| Title                     | 1  | Identify the report as a systematic review, meta-analysis, or both.                                                                                                                                                                                                                                         | 1                  |
| <b>ABSTRACT</b>           |    |                                                                                                                                                                                                                                                                                                             |                    |
| Structured summary        | 2  | Provide a structured summary including, as applicable: background; objectives; data sources; study eligibility criteria, participants, and interventions; study appraisal and synthesis methods; results; limitations; conclusions and implications of key findings; systematic review registration number. | 3                  |
| <b>INTRODUCTION</b>       |    |                                                                                                                                                                                                                                                                                                             |                    |
| Rationale                 | 3  | Describe the rationale for the review in the context of what is already known.                                                                                                                                                                                                                              | 4                  |
| Objectives                | 4  | Provide an explicit statement of questions being addressed with reference to participants, interventions, comparisons, outcomes, and study design (PICOS).                                                                                                                                                  | 4                  |
| <b>METHODS</b>            |    |                                                                                                                                                                                                                                                                                                             |                    |
| Protocol and registration | 5  | Indicate if a review protocol exists, if and where it can be accessed (e.g., Web address), and, if available, provide registration information including registration number.                                                                                                                               |                    |
| Eligibility criteria      | 6  | Specify study characteristics (e.g., PICOS, length of follow-up) and report characteristics (e.g., years considered, language, publication status) used as criteria for eligibility, giving rationale.                                                                                                      | 5                  |
| Information sources       | 7  | Describe all information sources (e.g., databases with dates of coverage, contact with study authors to identify additional studies) in the search and date last searched.                                                                                                                                  | 5                  |
| Search                    | 8  | Present full electronic search strategy for at least one database, including any limits used, such that it could be repeated.                                                                                                                                                                               | 5                  |
| Study selection           | 9  | State the process for selecting studies (i.e., screening, eligibility, included in systematic review, and, if applicable, included in the meta-analysis).                                                                                                                                                   | 5                  |
| Data collection process   | 10 | Describe method of data extraction from reports (e.g., piloted forms, independently, in duplicate) and any processes for obtaining and confirming data from investigators.                                                                                                                                  | %                  |
| Data items                | 11 | List and define all variables for which data were sought (e.g., PICOS, funding sources) and any assumptions and simplifications made.                                                                                                                                                                       | 5                  |

|                                    |    |                                                                                                                                                                                                                        |       |
|------------------------------------|----|------------------------------------------------------------------------------------------------------------------------------------------------------------------------------------------------------------------------|-------|
| Risk of bias in individual studies | 12 | Describe methods used for assessing risk of bias of individual studies (including specification of whether this was done at the study or outcome level), and how this information is to be used in any data synthesis. | 6     |
| Summary measures                   | 13 | State the principal summary measures (e.g., risk ratio, difference in means).                                                                                                                                          | 6     |
| Synthesis of results               | 14 | Describe the methods of handling data and combining results of studies, if done, including measures of consistency (e.g., $I^2$ ) for each meta-analysis.                                                              | 6     |
| Risk of bias across studies        | 15 | Specify any assessment of risk of bias that may affect the cumulative evidence (e.g., publication bias, selective reporting within studies).                                                                           | 6     |
| Additional analyses                | 16 | Describe methods of additional analyses (e.g., sensitivity or subgroup analyses, meta-regression), if done, indicating which were pre-specified.                                                                       | 6     |
| <b>RESULTS</b>                     |    |                                                                                                                                                                                                                        |       |
| Study selection                    | 17 | Give numbers of studies screened, assessed for eligibility, and included in the review, with reasons for exclusions at each stage, ideally with a flow diagram.                                                        | 7     |
| Study characteristics              | 18 | For each study, present characteristics for which data were extracted (e.g., study size, PICOS, follow-up period) and provide the citations.                                                                           | &     |
| Risk of bias within studies        | 19 | Present data on risk of bias of each study and, if available, any outcome level assessment (see item 12).                                                                                                              | 7     |
| Results of individual studies      | 20 | For all outcomes considered (benefits or harms), present, for each study: (a) simple summary data for each intervention group (b) effect estimates and confidence intervals, ideally with a forest plot.               | 7     |
| Synthesis of results               | 21 | Present results of each meta-analysis done, including confidence intervals and measures of consistency.                                                                                                                | 7     |
| Risk of bias across studies        | 22 | Present results of any assessment of risk of bias across studies (see Item 15).                                                                                                                                        | 7     |
| Additional analysis                | 23 | Give results of additional analyses, if done (e.g., sensitivity or subgroup analyses, meta-regression [see Item 16]).                                                                                                  | 7,8,9 |
| <b>DISCUSSION</b>                  |    |                                                                                                                                                                                                                        |       |
| Summary of evidence                | 24 | Summarize the main findings including the strength of evidence for each main outcome; consider their relevance to key groups (e.g., healthcare providers, users, and policy makers).                                   | 9     |
| Limitations                        | 25 | Discuss limitations at study and outcome level (e.g., risk of bias), and at review-level (e.g., incomplete retrieval of identified research, reporting bias).                                                          | 10    |
| Conclusions                        | 26 | Provide a general interpretation of the results in the context of other evidence, and implications for future research.                                                                                                | 11    |

| <b>FUNDING</b> |    |                                                                                                                                            |   |
|----------------|----|--------------------------------------------------------------------------------------------------------------------------------------------|---|
| Funding        | 27 | Describe sources of funding for the systematic review and other support (e.g., supply of data); role of funders for the systematic review. | 1 |

*From:* Moher D, Liberati A, Tetzlaff J, Altman DG, The PRISMA Group (2009). Preferred Reporting Items for Systematic Reviews and Meta-Analyses: The PRISMA Statement. PLoS Med 6(7): e1000097. doi:10.1371/journal.pmed1000097

For more information, visit: [www.prisma-statement.org](http://www.prisma-statement.org).
