# Supplementary material
Source: PubMed Central journal article supplement (PMC10620674)
Supplement: jamadermatol-e234090-s002.pdf [file jamadermatol-e234090-s002.pdf]

## Data Sharing Statement

Ingrassia. Cardiovascular and Venous Thromboembolic Risk With JAK Inhibitors in Immune-Mediated Inflammatory Skin Diseases. *JAMA Dermatol.* Published November 01, 2023.  
doi:10.1001/jamadermatol.2023.4090

### Data

**Data available:** Yes

**Data types:** Deidentified participant data

**How to access data:** With reasonable request from [haisumbajwa@live.com](mailto:haisumbajwa@live.com).

**When available:** With publication

### Supporting Documents

**Document types:** None

### Additional Information

**Who can access the data:** researchers whose proposed use of the data has been approved

**Types of analyses:** for a specified purpose

**Mechanisms of data availability:** with a signed data access agreement
